# Supplementary material
Source: PubMed Central journal article supplement (PMC2719948)
Supplement: JCI37607sd.pdf [file JCI37607sd.pdf]

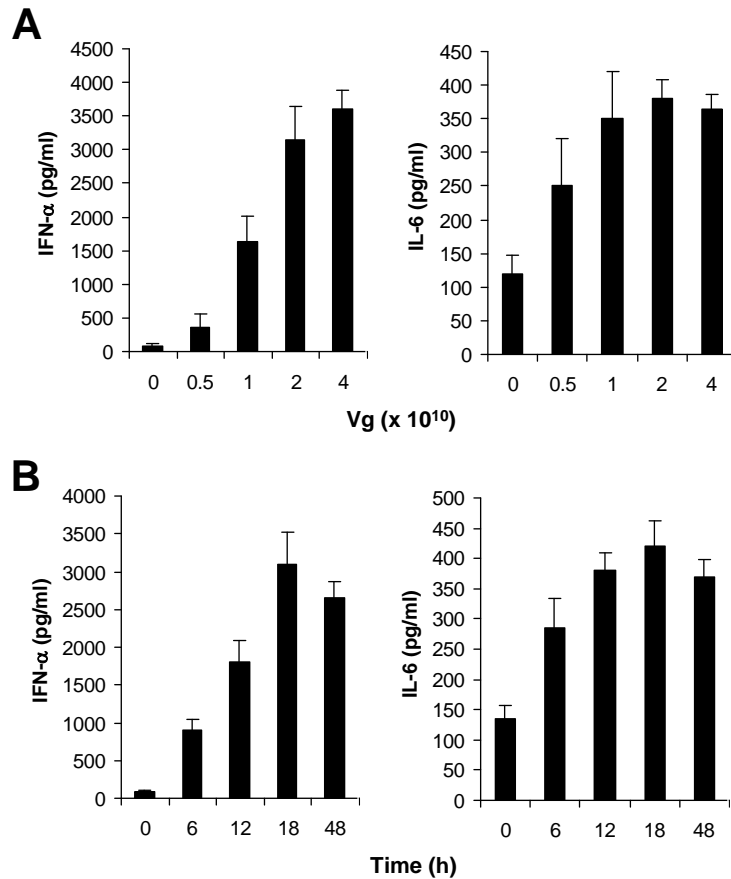

### Supplemental Figure 1

Kinetics of cytokine production by pDCs upon AAV2 infection. pDCs were generated from bone marrow cells in the presence of Flt-3 ligand and purified by FACS. **(A)** Cells ( $1 \times 10^6$ ) were stimulated with AAV2-LacZ at indicated doses for 18 hr and the supernatants were assayed for IFN- $\alpha$  and IL-6 secretion by ELISA. **(B)** Cells were stimulated with AAV2-lacZ at  $2 \times 10^{10}$  vg for 0, 6, 12, 18, or 48 h, and the supernatants were measured for IFN- $\alpha$  and IL-6 by ELISA.

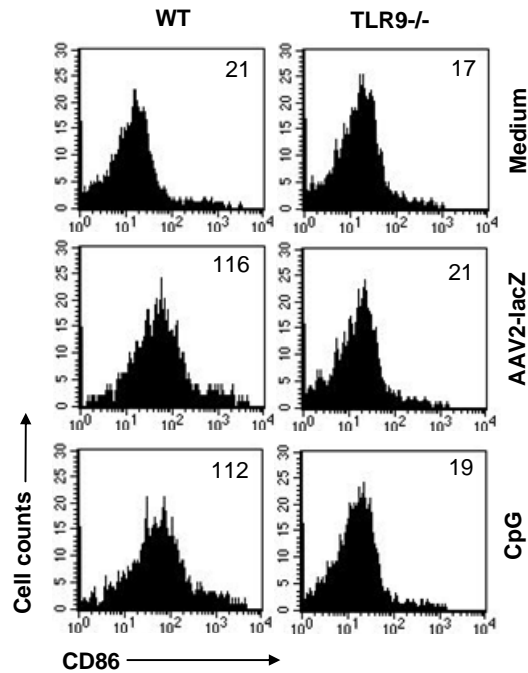

### Supplemental Figure 2

AAV promotes DC maturation via TLR9. pDCs were generated from bone marrow cells in the presence of Flt-3 ligand and purified by FACS sorting. Cells ( $1 \times 10^6$ ) were then stimulated with AAV2-lacZ ( $2 \times 10^{10}$  vg), CpG ( $5 \mu\text{g/ml}$ ), or left unstimulated (Medium) for 18 h and analyzed for expression of CD86 by FACS. The mean fluorescence intensity is indicated.

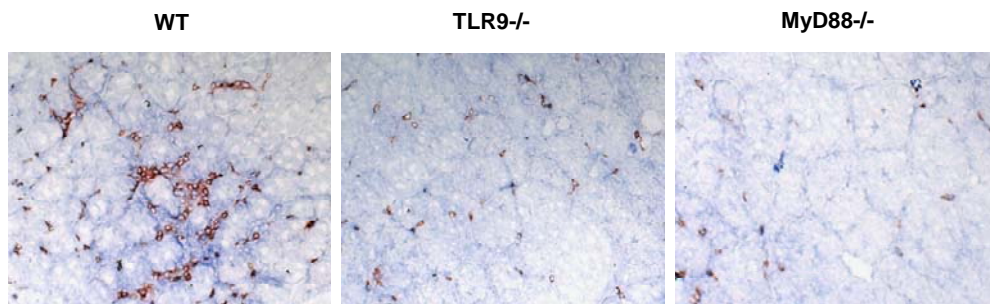

**Supplemental Figure 3**

Infiltration of CD8 T cells into AAV-infected muscles. AAV2-HA ( $1 \times 10^{11}$  vg) was injected intramuscularly into WT, TLR9<sup>-/-</sup>, or MyD88<sup>-/-</sup> mice. 26 days later, the infected muscles were harvested and analyzed for CD8 T cell infiltration by immunohistochemistry.
